# Supplementary figures and images for: DraGnET: Software for storing, managing and analyzing annotated draft genome sequence data
Source: Springer Nature journal article supplement (doi:10.1186/1471-2105-11-100), 2010-02-22

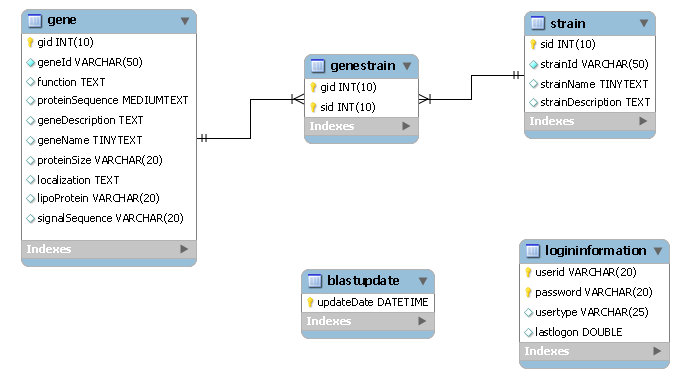

Supplement: Additional file 2 [file 1471-2105-11-100-s2.docx]
